# Supplementary material
Source: HighWire-hosted journal article supplement (https://thorax.bmj.com/content/thoraxjnl-2019-214375)
Supplement: inline-supplementary-material-1 [file inline-supplementary-material-1.pdf]

## Supplemental Material

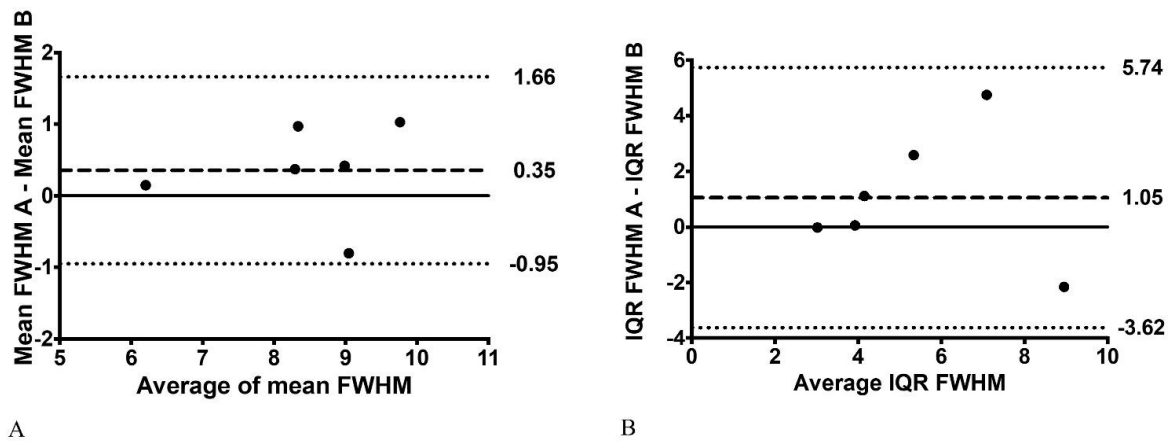

Supplemental figure: Bland Altman plots for mean (A) and interquartile range (B) of full width of half maximum (FWHM), respectively. Bias in dark line and 95% limits of agreement in dotted lines. All metrics in seconds.

Temporal resolution was altered slightly for each case due to the bespoke slice positioning by the MR radiographer on each scan session, we acknowledge this as a potential limitation and this has now been included in the discussion of the manuscript. This is reported in the table below.

| Patient | Session A temporal resolution | Session B temporal resolution | %difference |
|---------|-------------------------------|-------------------------------|-------------|
| IPF01   | 0.643                         | 0.598                         | -7.00%      |
| IPF05   | 0.643                         | 0.605                         | -5.91%      |
| IPF06   | 0.735                         | 0.689                         | -6.26%      |
| IPF08   | 0.643                         | 0.605                         | -5.91%      |
| IPF12   | 0.689                         | 0.689                         | 0.00%       |
| IPF13   | 0.643                         | 0.605                         | -5.91%      |

These data tables describe the standard deviation of FWHM per slice for every subject

| IPF01_V1    | IPF01_V2    | IPF01_V3    | IPF02_V1    | IPF03_V2      | IPF03_V3    | IPF04_V1    |
|-------------|-------------|-------------|-------------|---------------|-------------|-------------|
| 0           | 0           | 0           | 0           | 0             | 0           | 1.375824039 |
| 0           | 0           | 0           | 0           | 0             | 3.748868363 | 1.125908851 |
| 3.230170062 | 1.906742047 | 0           | 0           | 0             | 1.632178465 | 1.365361449 |
| 1.145578372 | 1.075037303 | 1.857315571 | 3.688019809 | 1.303071621   | 0.982666973 | 1.321468181 |
| 1.286840013 | 1.430626114 | 1.699289184 | 1.953734127 | 1.827663589   | 1.12096587  | 1.408456014 |
| 1.352593464 | 1.530760124 | 1.660268208 | 1.335187306 | 1.690528544   | 1.218392555 | 1.480310123 |
| 1.403170747 | 1.683851347 | 1.38756886  | 1.476129077 | 1.326370021   | 1.362138037 | 1.722864528 |
| 1.393082117 | 1.657934782 | 1.494826372 | 1.420648213 | 1.923430187   | 1.63828986  | 1.99141668  |
| 1.626379469 | 1.782973958 | 1.625285116 | 1.513076618 | 1.790750775   | 1.943733661 | 2.266157421 |
| 1.920743309 | 1.784817782 | 1.786582751 | 1.820972211 | 2.49580359    | 2.329845476 | 2.101947784 |
| 1.872853293 | 1.880359735 | 1.76293266  | 1.845032521 | 2.811838743   | 2.327241407 | 2.105683184 |
| 2.233703356 | 1.923056052 | 2.046335492 | 1.479539121 | 2.918170339   | 2.493145778 | 2.339599502 |
| 2.506628053 | 2.078024561 | 2.16986447  | 1.675524796 | 2.960871929   | 2.927609646 | 2.727234442 |
| 2.617540073 | 2.463001677 | 2.105974531 | 1.781407648 | 3.323558941   | 2.940833567 | 2.596737392 |
| 2.458995992 | 2.933867039 | 2.29903174  | 1.857108076 | 3.143460355   | 3.095392584 | 1.978425245 |
| 2.30636281  | 2.728440877 | 2.502830321 | 1.955440327 | 3.25598213    | 2.957795196 | 2.506315762 |
| 2.552244481 | 2.991197164 | 2.31851815  | 1.763647945 | 3.446258895   | 3.204356843 | 2.78440554  |
| 2.625109073 | 3.225569955 | 2.40683953  | 1.759452721 | 3.213986197   | 3.518511989 | 3.34212727  |
| 3.020090034 | 3.943758462 | 3.033351668 | 4.230249116 | 3.667680958   | 3.575192711 | 4.405564108 |
| 3.154947993 | 3.580125078 | 3.47653254  | 1.231200962 | 4.023852445   | 3.753483134 | 3.33901327  |
| 3.908026867 | 3.534013891 | 3.818088689 |             | 0 4.743311539 | 4.611754829 | 5.188491602 |
|             | 0           | 2.814635452 |             | 0 4.649302606 | 4.837745364 | 7.219525561 |
|             | 0           | 0           |             | 0 5.060903593 | 4.878497705 | 0           |
|             | 0           | 0           |             | 0 5.625570606 | 4.220317869 | 0           |
|             | 0           | 0           |             | 0 5.975555691 | 3.215654658 | 0           |
|             | 0           | 0           |             | 0 6.462019654 | 0           | 0           |
|             | 0           | 0           |             | 0 8.068960758 | 0           | 0           |
|             | 0           | 0           |             | 0             | 0           | 0           |
|             | 0           | 0           |             | 0             | 0           | 0           |
|             | 0           | 0           |             | 0             | 0           | 0           |
|             | 0           | 0           |             | 0             | 0           | 0           |
|             | 0           | 0           |             | 0             | 0           | 0           |
|             | 0           | 0           |             | 0             | 0           | 0           |
|             | 0           | 0           |             | 0             | 0           | 0           |
|             | 0           | 0           |             | 0             | 0           | 0           |

| IPF04_V2    | IPF04_V3    | IPF05_V1    | IPF05_V2    | IPF06_V1    | IPF06_V2    | IPF06_V3    |
|-------------|-------------|-------------|-------------|-------------|-------------|-------------|
| 0           | 0           | 0           | 0           | 0           | 0           | 0           |
| 2.101566926 | 2.407905315 | 2.628085102 | 0           | 0           | 0           | 4.779499874 |
| 1.782033568 | 1.17143759  | 1.635086512 | 0           | 0           | 2.355386149 | 2.75115271  |
| 1.431983214 | 1.230290405 | 1.11021529  | 0           | 1.183858123 | 1.901782355 | 3.434184354 |
| 1.430324119 | 1.272896664 | 1.142469335 | 1.562522059 | 2.016176795 | 2.567791826 | 3.31498729  |
| 1.427876968 | 1.323878003 | 1.160410704 | 1.448325365 | 2.09412143  | 2.353439783 | 2.657851682 |
| 1.363144576 | 1.313493919 | 1.254562393 | 1.48473594  | 1.57976901  | 2.253247083 | 2.503339397 |
| 1.557154344 | 1.414194174 | 1.499161617 | 1.348770618 | 1.977673861 | 2.574079414 | 2.912128229 |
| 1.694757555 | 1.343505103 | 1.863061537 | 1.618377431 | 1.96930177  | 2.308093665 | 2.469821736 |
| 1.847340889 | 1.562230279 | 2.021554367 | 1.594925108 | 2.832096139 | 2.461667291 | 3.282761729 |
| 1.84529581  | 1.662900671 | 2.431931699 | 2.059732315 | 2.969284677 | 2.640523067 | 2.723555356 |
| 2.304994342 | 1.701625204 | 1.819948892 | 2.128989014 | 3.276411133 | 2.6200721   | 2.074377965 |
| 2.248092968 | 1.6794586   | 2.053218753 | 1.980898864 | 3.248154173 | 2.749234933 | 2.646756436 |
| 2.240958749 | 2.041633342 | 1.906578204 | 1.820173291 | 3.405745093 | 2.779688463 | 2.361797019 |
| 2.325758126 | 1.893964968 | 1.823289982 | 2.118689015 | 3.368634103 | 3.01635492  | 2.719623814 |
| 2.761169126 | 1.797790922 | 1.939750377 | 1.766482109 | 3.082164499 | 2.841203427 | 3.285824487 |
| 2.789763509 | 1.402569768 | 1.805650033 | 1.836427986 | 2.885924297 | 2.923225691 | 2.599963448 |
| 2.9575712   | 2.278651664 | 1.527566317 | 1.826385896 | 2.381152434 | 2.53235805  | 2.531148951 |
| 3.221988244 | 3.676087249 | 1.810094149 | 2.296160783 | 2.476330003 | 2.658745237 | 2.272354196 |
| 3.985506421 | 2.462135033 | 1.649431344 | 2.090344719 | 2.889261848 | 2.443728539 | 1.816584702 |
| 3.946584542 | 2.580316983 | 1.046589216 | 2.221877768 | 3.196297812 | 2.131087193 | 1.499441447 |
| 3.964395283 | 3.165881754 | 0           | 1.880610545 | 2.730593753 | 2.358672115 | 1.592662187 |
| 6.104966719 | 0           | 0           | 1.656334254 | 3.12871259  | 2.53082418  | 0           |
| 0           | 0           | 0           | 0           | 2.862726276 | 2.973090537 | 0           |
| 0           | 0           | 0           | 0           | 4.724100032 | 0.990286317 | 0           |
| 0           | 0           | 0           | 0           | 4.526939886 | 0           | 0           |
| 0           | 0           | 0           | 0           | 0           | 0           | 0           |
| 0           | 0           | 0           | 0           | 0           | 0           | 0           |
| 0           | 0           | 0           | 0           | 0           | 0           | 0           |
| 0           | 0           | 0           | 0           | 0           | 0           | 0           |
| 0           | 0           | 0           | 0           | 0           | 0           | 0           |
| 0           | 0           | 0           | 0           | 0           | 0           | 0           |
| 0           | 0           | 0           | 0           | 0           | 0           | 0           |
| 0           | 0           | 0           | 0           | 0           | 0           | 0           |

| IPF08_V1    | IPF08_V2    | IPF08_V3    | IPF09_V1    | IPF09_V2    | IPF09_V3    | IPF11_V1    |
|-------------|-------------|-------------|-------------|-------------|-------------|-------------|
| 0           | 0           | 0           | 0           | 0           | 0           | 0           |
| 1.828870216 | 0           | 0           | 0           | 0           | 0           | 0           |
| 1.077034966 | 0           | 0.959237954 | 0           | 0           | 0           | 0           |
| 1.153258075 | 4.680802125 | 1.298837609 | 0           | 0           | 0.843128374 | 0           |
| 1.235539071 | 1.347535942 | 1.436757022 | 4.098781282 | 2.028452705 | 2.105108959 | 1.461226594 |
| 1.318385668 | 1.431561114 | 1.364820837 | 3.818596022 | 1.354007069 | 2.732747072 | 3.976560455 |
| 1.413360181 | 1.610812956 | 1.302217393 | 3.195348067 | 1.765147521 | 3.321821548 | 3.374685682 |
| 1.396500587 | 1.618065482 | 1.518047237 | 2.34264092  | 1.712217326 | 1.811825774 | 3.357033383 |
| 1.525815032 | 1.679591479 | 1.487386881 | 2.190767911 | 2.356626246 | 2.549355901 | 2.626342542 |
| 1.594114359 | 1.732340185 | 1.380395088 | 2.075551402 | 2.528236697 | 2.591571128 | 3.237675855 |
| 1.898281169 | 1.81898952  | 1.457200681 | 2.554312521 | 2.596622584 | 3.188405242 | 3.300479139 |
| 2.221091083 | 1.978872926 | 1.588209965 | 3.426790901 | 2.734072407 | 3.018749414 | 3.502643647 |
| 2.190837686 | 2.059816868 | 1.748222145 | 3.471838564 | 3.055851907 | 4.565253725 | 2.949412859 |
| 2.001888353 | 2.203944989 | 1.822300786 | 3.582833088 | 3.970822297 | 3.465685539 | 3.018828849 |
| 2.226961813 | 2.165827768 | 1.884625042 | 3.7095501   | 3.881410929 | 4.589568644 | 3.581447884 |
| 2.55229556  | 2.092107783 | 1.520290813 | 3.890760865 | 4.842065088 | 5.437635225 | 3.976263913 |
| 2.566831142 | 1.806397484 | 1.855170552 | 4.493674826 | 5.777018942 | 6.632423062 | 4.083508064 |
| 2.698540007 | 2.265078738 | 2.009294786 | 4.738559775 | 6.989479836 | 6.824658095 | 3.554035975 |
| 3.495081001 | 2.31835426  | 2.635832269 | 3.771460861 | 6.173405545 | 6.208368653 | 3.524215495 |
| 3.194110061 | 3.070154075 | 2.546697159 | 4.066856528 | 5.72028172  | 4.846190897 | 3.428499116 |
| 3.453764313 | 2.482746983 | 2.662195916 | 5.19020279  | 5.912863386 | 6.429776051 | 3.664323637 |
| 0           | 3.25804192  | 3.437701921 | 0           | 0           | 2.407647251 | 0           |
| 0           | 2.566285376 | 0           | 0           | 0           | 0           | 0           |
| 0           | 2.210053913 | 0           | 0           | 0           | 0           | 0           |
| 0           | 0           | 0           | 0           | 0           | 0           | 0           |
| 0           | 0           | 0           | 0           | 0           | 0           | 0           |
| 0           | 0           | 0           | 0           | 0           | 0           | 0           |
| 0           | 0           | 0           | 0           | 0           | 0           | 0           |
| 0           | 0           | 0           | 0           | 0           | 0           | 0           |
| 0           | 0           | 0           | 0           | 0           | 0           | 0           |
| 0           | 0           | 0           | 0           | 0           | 0           | 0           |
| 0           | 0           | 0           | 0           | 0           | 0           | 0           |
| 0           | 0           | 0           | 0           | 0           | 0           | 0           |
| 0           | 0           | 0           | 0           | 0           | 0           | 0           |
| 0           | 0           | 0           | 0           | 0           | 0           | 0           |
| 0           | 0           | 0           | 0           | 0           | 0           | 0           |
| 0           | 0           | 0           | 0           | 0           | 0           | 0           |
| 0           | 0           | 0           | 0           | 0           | 0           | 0           |

| IPF12_V1    | IPF12_V2    | IPF12_V3    | IPF13_V1    | IPF13_V2    | IPF17_V1    | IPF17_V2    |
|-------------|-------------|-------------|-------------|-------------|-------------|-------------|
| 0           | 0           | 0           | 0           | 0           | 0           | 0           |
| 0           | 2.074204391 | 0           | 1.255748091 | 0           | 1.199959673 | 2.76809503  |
| 2.110561266 | 1.212538364 | 0           | 4.030969904 | 1.021286229 | 1.145512679 | 1.057263087 |
| 3.016784115 | 1.699389662 | 0           | 3.510784247 | 4.085198181 | 1.210771566 | 1.113948636 |
| 3.162909335 | 1.591383077 | 0           | 2.611615356 | 4.707111646 | 1.00039061  | 1.100251693 |
| 2.593645694 | 1.556866968 | 0           | 3.098426355 | 4.315379843 | 1.084243207 | 1.228128872 |
| 2.082812641 | 1.623359367 | 2.454492682 | 2.738677859 | 3.548676646 | 1.061083589 | 1.211914864 |
| 2.262360798 | 1.814524065 | 2.530261652 | 3.448884884 | 3.471403679 | 0.973416722 | 1.076818177 |
| 2.419571602 | 1.897621935 | 2.03809788  | 3.654586163 | 4.028213235 | 1.20603622  | 1.303643259 |
| 3.052123335 | 2.380764423 | 2.114754698 | 3.974291356 | 4.317561287 | 1.296374961 | 1.515199687 |
| 2.799923146 | 2.833539354 | 2.257399142 | 3.988111493 | 4.274501263 | 1.336740613 | 1.461945062 |
| 3.132079161 | 2.44288981  | 2.710164181 | 4.115754873 | 5.064336787 | 1.395754089 | 1.782012756 |
| 2.913582958 | 2.663130577 | 2.974716836 | 4.727030231 | 5.202548189 | 1.398256345 | 1.844263852 |
| 3.179501945 | 2.408825171 | 3.285418206 | 5.048028077 | 5.417516035 | 1.841918678 | 2.27272072  |
| 3.062697718 | 2.479424954 | 3.393019754 | 4.922607189 | 4.823458746 | 1.776236373 | 2.171742137 |
| 2.51548944  | 2.338881858 | 3.272415071 | 5.264795265 | 5.067293871 | 1.741791948 | 2.440322323 |
| 2.648677373 | 2.068851678 | 3.884072611 | 5.131259214 | 5.028888415 | 1.894160563 | 2.315774561 |
| 2.603112211 | 1.960689682 | 3.4274487   | 5.392243964 | 5.05176042  | 2.388187188 | 3.323349863 |
| 2.165664567 | 2.365727965 | 4.054362795 | 5.319592233 | 5.526683335 | 2.468171475 | 3.440314631 |
| 2.001829965 | 1.654841652 | 4.204053682 | 5.414025353 | 5.186883374 | 2.330023686 | 5.252942521 |
| 1.878244052 | 2.016519399 | 3.490970637 | 5.699328729 | 4.99010428  | 1.099750894 | 1.57643385  |
| 2.10200195  | 1.099687585 | 3.780117163 | 0           | 3.790874596 | 0           | 0           |
| 1.600629449 | 0           | 2.40966641  | 0           | 0           | 0           | 0           |
| 1.316105325 | 0           | 1.716362845 | 0           | 0           | 0           | 0           |
| 0           | 0           | 1.48073427  | 0           | 0           | 0           | 0           |
| 0           | 0           | 1.669868274 | 0           | 0           | 0           | 0           |
| 0           | 0           | 1.312735103 | 0           | 0           | 0           | 0           |
| 0           | 0           | 0           | 0           | 0           | 0           | 0           |
| 0           | 0           | 0           | 0           | 0           | 0           | 0           |
| 0           | 0           | 0           | 0           | 0           | 0           | 0           |
| 0           | 0           | 0           | 0           | 0           | 0           | 0           |
| 0           | 0           | 0           | 0           | 0           | 0           | 0           |
| 0           | 0           | 0           | 0           | 0           | 0           | 0           |
| 0           | 0           | 0           | 0           | 0           | 0           | 0           |
| 0           | 0           | 0           | 0           | 0           | 0           | 0           |

| IPF17_V3    | IPF18_V1    | IPF18_V2    | IPF18_V3    | IPF19_V1    | IPF19_V2    | IPF19_V3    |
|-------------|-------------|-------------|-------------|-------------|-------------|-------------|
| 0           | 0           | 0           | 0           | 0           | 0           | 0           |
| 0           | 0           | 0           | 0           | 0           | 0           | 0           |
| 0           | 1.168610606 | 0           | 0           | 3.830906253 | 0           | 0           |
| 0           | 1.253271798 | 0           | 0           | 1.658885603 | 0           | 0           |
| 2.827951864 | 1.22524803  | 0           | 0           | 1.564558966 | 3.427635666 | 0           |
| 1.540879479 | 1.165875174 | 5.521600518 | 1.291000438 | 1.599392274 | 2.448697863 | 2.262754241 |
| 1.317347122 | 1.305487753 | 2.37133853  | 1.834717644 | 1.710520383 | 1.972744608 | 2.302455923 |
| 1.225564359 | 1.263676396 | 1.634827777 | 1.825278478 | 1.907156693 | 2.347054148 | 1.794889349 |
| 1.099896005 | 1.336268473 | 1.695441994 | 1.89559919  | 1.736656319 | 2.475332354 | 2.062546873 |
| 1.143975222 | 1.559081387 | 1.861157939 | 1.896594564 | 1.68283542  | 1.617638798 | 2.089313554 |
| 1.294239124 | 1.857975853 | 1.720092043 | 2.104644541 | 1.935420024 | 1.906055835 | 1.886934367 |
| 1.600326698 | 1.536751799 | 2.145570607 | 1.856086886 | 1.852680257 | 1.793993207 | 1.763664594 |
| 1.595989388 | 1.844359813 | 2.19294275  | 1.961431522 | 1.815691187 | 1.279580362 | 1.700371218 |
| 2.070467497 | 1.843559716 | 2.221273791 | 1.77225189  | 1.705742585 | 1.375410195 | 1.661324903 |
| 2.280367536 | 1.848020996 | 1.870622822 | 2.247952447 | 1.623894598 | 1.299992194 | 1.725069162 |
| 2.355326691 | 1.983830084 | 1.883358252 | 2.198620871 | 1.957229925 | 1.352907403 | 1.50471312  |
| 2.538635529 | 1.905689724 | 1.867367572 | 2.002523845 | 2.370540685 | 1.452686703 | 1.683980396 |
| 2.469781661 | 1.897271891 | 2.509383509 | 2.064261519 | 2.797826674 | 2.267597671 | 1.742451138 |
| 3.006016389 | 1.811402319 | 2.219405663 | 1.875472149 | 2.211413466 | 1.337887695 | 1.591065264 |
| 2.763742409 | 2.885260003 | 2.068896428 | 1.881679886 | 2.555572541 | 1.173954939 | 1.871962905 |
| 2.469640695 | 3.39218774  | 1.583092122 | 1.838542756 | 3.891036629 | 0.836633064 | 1.740272167 |
| 3.247139695 | 0           | 2.623203659 | 2.144085861 | 4.364970996 | 0.925709352 | 1.361008852 |
| 4.322293544 | 0           | 3.587435477 | 2.61874684  | 1.553939781 | 2.501978666 | 0.953218298 |
| 5.467068142 | 0           | 3.422099245 | 2.178282681 | 0           | 3.409983086 | 1.585430129 |
| 6.548063056 | 0           | 0           | 0           | 0           | 0           | 1.566342114 |
| 0           | 0           | 0           | 0           | 0           | 0           | 0           |
| 0           | 0           | 0           | 0           | 0           | 0           | 0           |
| 0           | 0           | 0           | 0           | 0           | 0           | 0           |
| 0           | 0           | 0           | 0           | 0           | 0           | 0           |
| 0           | 0           | 0           | 0           | 0           | 0           | 0           |
| 0           | 0           | 0           | 0           | 0           | 0           | 0           |
| 0           | 0           | 0           | 0           | 0           | 0           | 0           |
| 0           | 0           | 0           | 0           | 0           | 0           | 0           |

| IPF22_V1    | IPF22_V2    | IPF22_V3    | IPF23_V2    | IPF23_V3    | IPF24_V2    | IPF24_V3    |
|-------------|-------------|-------------|-------------|-------------|-------------|-------------|
| 0           | 0           | 0           | 0           | 0           | 0           | 0           |
| 0           | 0           | 0           | 0           | 0           | 0           | 0           |
| 0           | 0           | 0           | 0           | 0           | 1.336801467 | 0           |
| 0           | 1.087381147 | 1.687066922 | 0           | 4.06932642  | 1.503086385 | 1.427708191 |
| 0           | 1.130399758 | 2.01377952  | 4.105579905 | 5.053256724 | 1.441359483 | 2.067733798 |
| 1.650577661 | 1.117370705 | 2.550286015 | 2.846929962 | 2.986608506 | 1.457078352 | 1.867418926 |
| 1.535318112 | 1.015306536 | 2.744535756 | 2.068308661 | 3.0043902   | 1.631137352 | 1.660149233 |
| 1.523295779 | 1.027376517 | 2.721351961 | 1.990930618 | 3.189237434 | 1.467152719 | 1.782029823 |
| 1.386451123 | 1.160961461 | 2.97796632  | 2.265211095 | 3.857465824 | 1.642659063 | 1.646202971 |
| 1.340596314 | 1.210789905 | 3.05959834  | 2.311393843 | 3.81546745  | 1.706212058 | 1.89685748  |
| 1.344348595 | 1.20744384  | 2.731819862 | 2.370188619 | 3.884386194 | 1.459537075 | 1.99360069  |
| 1.613061159 | 1.306225622 | 2.962876896 | 2.969291348 | 4.113009333 | 1.685981036 | 2.209436173 |
| 1.746284341 | 1.345880072 | 3.384361172 | 3.763301873 | 4.572954909 | 2.452038799 | 2.006652338 |
| 1.78058704  | 1.378041141 | 3.791709446 | 4.030662297 | 4.601103918 | 2.806133844 | 1.918580403 |
| 2.114208414 | 1.232340722 | 3.709675336 | 3.389808487 | 4.428143152 | 2.809721351 | 3.561880361 |
| 2.115570421 | 1.132295699 | 3.662799103 | 2.782098018 | 4.623369412 | 2.295863564 | 2.23316157  |
| 1.722378666 | 1.400411199 | 3.70205631  | 2.387044814 | 2.631926841 | 1.91653083  | 2.169282396 |
| 1.851614191 | 1.436080998 | 3.985785408 | 3.040494576 | 1.154489567 | 2.512372569 | 2.121826106 |
| 1.775924692 | 1.566191988 | 4.995248303 | 2.809103251 | 0           | 2.103579498 | 2.260077567 |
| 1.777531678 | 1.811537547 | 4.404215848 | 0           | 0           | 3.556470426 | 2.316689963 |
| 1.88475686  | 2.415198832 | 3.505431147 | 0           | 0           | 4.947412467 | 2.653906724 |
| 2.13828084  | 0           | 0           | 0           | 0           | 0           | 2.592518203 |
| 1.957888441 | 0           | 0           | 0           | 0           | 0           | 2.230205079 |
| 0           | 0           | 0           | 0           | 0           | 0           | 0           |
| 0           | 0           | 0           | 0           | 0           | 0           | 0           |
| 0           | 0           | 0           | 0           | 0           | 0           | 0           |
| 0           | 0           | 0           | 0           | 0           | 0           | 0           |
| 0           | 0           | 0           | 0           | 0           | 0           | 0           |
| 0           | 0           | 0           | 0           | 0           | 0           | 0           |
| 0           | 0           | 0           | 0           | 0           | 0           | 0           |
| 0           | 0           | 0           | 0           | 0           | 0           | 0           |
| 0           | 0           | 0           | 0           | 0           | 0           | 0           |
| 0           | 0           | 0           | 0           | 0           | 0           | 0           |
| 0           | 0           | 0           | 0           | 0           | 0           | 0           |





| IPF28_V1    | IPF28_V2    | IPF28_V3    | IPF29_V1    | IPF30_V1    | IPF30_V2    | IPF30_V3    |
|-------------|-------------|-------------|-------------|-------------|-------------|-------------|
|             | 0           | 0           | 0           | 0           | 0           | 0           |
|             | 0           | 0           | 0           | 0           | 0           | 0.72846992  |
|             | 0           | 1.153166537 | 0           | 0           | 1.176987686 | 1.062423994 |
| 1.084125937 | 1.855362231 |             | 0           | 1.059102435 | 0.897933086 | 1.066668575 |
| 0.948280361 | 1.458996856 |             | 0           | 1.217159576 | 0.950141683 | 1.506374576 |
| 1.162354508 | 1.209450859 |             | 0           | 1.011179099 | 1.18690558  | 1.388796961 |
| 1.06432752  | 1.441018856 |             | 0           | 0.854324949 | 1.162585616 | 1.567699756 |
| 1.141669217 | 1.770136644 | 1.308746588 | 0.841839591 | 1.202732628 | 2.006899654 | 1.67158644  |
| 1.196513612 | 1.595228045 | 1.166246385 | 0.878972127 | 1.564387619 | 1.719297771 | 1.657281436 |
| 1.015497086 | 1.948235466 | 1.400162864 | 1.304654206 | 1.221552505 | 1.993370274 | 1.781162791 |
| 1.262350444 | 2.583749915 | 1.281499993 | 1.445297112 | 1.497253522 | 2.094106701 | 1.570765163 |
| 1.13419116  | 2.641607981 | 1.590225146 | 1.472766988 | 1.844680054 | 1.777879446 | 1.745450348 |
| 1.373379347 | 2.015810937 | 1.839559608 | 1.390682864 | 2.497596587 | 2.119881719 | 2.15964343  |
| 1.450860375 | 2.406739355 | 1.592742356 | 1.716056446 | 1.793868846 | 2.36340811  | 1.783323662 |
| 1.445820976 | 2.218554415 | 2.417340769 | 1.627747967 | 1.76160225  | 1.957871572 | 1.772831572 |
| 1.391731511 | 3.368688055 | 2.191427492 | 1.577439156 | 1.751728368 | 1.953970682 | 1.944007854 |
| 1.5627032   | 2.736484498 | 3.11569885  | 1.301153522 | 1.248501064 | 1.874267179 | 1.760911693 |
| 2.389165515 | 2.501169476 | 3.14721484  | 1.578490633 | 1.432332045 | 2.129800724 | 1.627252821 |
| 2.453654718 |             | 0           | 2.212975309 |             | 0           | 1.423588659 |
|             | 0           | 0           | 2.726457502 |             | 0           | 1.192093147 |
|             | 0           | 0           | 2.1619833   |             | 0           | 1.327310903 |
|             | 0           | 0           | 3.288141594 |             | 0           | 1.60645129  |
|             | 0           | 0           | 3.482793813 |             | 0           |             |
|             | 0           | 0           | 0           |             | 0           |             |
|             | 0           | 0           | 0           |             | 0           |             |
|             | 0           | 0           | 0           |             | 0           |             |
|             | 0           | 0           | 0           |             | 0           |             |
|             | 0           | 0           | 0           |             | 0           |             |
|             | 0           | 0           | 0           |             | 0           |             |
|             | 0           | 0           | 0           |             | 0           |             |
|             | 0           | 0           | 0           |             | 0           |             |
|             | 0           | 0           | 0           |             | 0           |             |
|             | 0           | 0           | 0           |             | 0           |             |
|             | 0           | 0           | 0           |             | 0           |             |
|             | 0           | 0           | 0           |             | 0           |             |
|             | 0           | 0           | 0           |             | 0           |             |
|             | 0           | 0           | 0           |             | 0           |             |
|             | 0           | 0           | 0           |             | 0           |             |
|             | 0           | 0           | 0           |             | 0           |             |
|             | 0           | 0           | 0           |             | 0           |             |
|             | 0           | 0           | 0           |             | 0           |             |
|             | 0           | 0           | 0           |             | 0           |             |

| IPF31_V1    | IPF31_V2    | IPF31_V3    | IPF32_V1    | IPF32_V2    | IPF33_V1    | IPF34_V1    |
|-------------|-------------|-------------|-------------|-------------|-------------|-------------|
| 0           | 0           | 0           | 0           | 0           | 0           | 0           |
| 0           | 0           | 0           | 0           | 0           | 0           | 0           |
| 1.64763968  | 2.197271472 | 0           | 0           | 0           | 0           | 0           |
| 1.309145237 | 1.956502769 | 2.021411016 | 0           | 3.128768613 | 2.99499872  | 1.338697174 |
| 1.910340284 | 2.0943918   | 1.778558213 | 4.362967021 | 3.049790923 | 3.269441444 | 1.372901289 |
| 1.958932696 | 1.956475441 | 1.730799689 | 2.814663716 | 3.013375979 | 2.938405375 | 1.707095569 |
| 1.713382665 | 2.111867644 | 1.765584437 | 2.456831671 | 2.772328654 | 3.339852839 | 1.679097375 |
| 1.640386312 | 1.957302848 | 1.876921803 | 2.772539692 | 3.257826572 | 3.179242352 | 2.108763456 |
| 1.976149099 | 2.125957714 | 1.495779757 | 3.286845917 | 3.652636994 | 3.1194374   | 2.435653968 |
| 1.766130431 | 2.119775824 | 2.082515436 | 3.135664504 | 3.510928152 | 2.619240859 | 2.137622492 |
| 2.629913364 | 1.736042029 | 1.669154386 | 3.029542625 | 3.700587245 | 2.478013139 | 2.507360387 |
| 2.008307989 | 1.900226475 | 2.101669556 | 3.749262893 | 3.575116173 | 2.355089636 | 2.655270789 |
| 1.880264437 | 1.90555339  | 2.139954931 | 3.748620514 | 3.812548089 | 2.71286603  | 2.419463008 |
| 1.898459637 | 2.015758004 | 2.092596734 | 4.693787542 | 3.717474996 | 2.783263179 | 2.569656535 |
| 1.790200237 | 3.12299288  | 2.389676333 | 4.603670379 | 3.567710421 | 2.794329669 | 2.396426858 |
| 1.935884728 | 3.031534318 | 2.569417155 | 4.475660497 | 3.529608739 | 2.433705526 | 2.061387046 |
| 2.169068178 | 2.8327809   | 2.327800107 | 3.630997433 | 3.677359059 | 2.735207037 | 2.212752707 |
| 2.302962996 | 3.289866321 | 2.942415445 | 2.917842335 | 2.784378179 | 2.905826511 | 2.539450191 |
| 2.684733757 | 3.805968621 | 3.347128935 | 3.771501618 | 2.279443122 | 3.291742624 | 2.879769755 |
| 0           | 6.115373689 | 5.854168741 | 3.25219041  | 2.113995188 | 2.90096216  | 3.091689254 |
| 0           | 0           | 0           | 3.351196531 | 0           | 0           | 3.419425569 |
| 0           | 0           | 0           | 1.639801512 | 0           | 0           | 0           |
| 0           | 0           | 0           | 0           | 0           | 0           | 0           |
| 0           | 0           | 0           | 0           | 0           | 0           | 0           |
| 0           | 0           | 0           | 0           | 0           | 0           | 0           |
| 0           | 0           | 0           | 0           | 0           | 0           | 0           |
| 0           | 0           | 0           | 0           | 0           | 0           | 0           |
| 0           | 0           | 0           | 0           | 0           | 0           | 0           |
| 0           | 0           | 0           | 0           | 0           | 0           | 0           |
| 0           | 0           | 0           | 0           | 0           | 0           | 0           |
| 0           | 0           | 0           | 0           | 0           | 0           | 0           |
| 0           | 0           | 0           | 0           | 0           | 0           | 0           |
| 0           | 0           | 0           | 0           | 0           | 0           | 0           |
| 0           | 0           | 0           | 0           | 0           | 0           | 0           |
| 0           | 0           | 0           | 0           | 0           | 0           | 0           |
| 0           | 0           | 0           | 0           | 0           | 0           | 0           |
| 0           | 0           | 0           | 0           | 0           | 0           | 0           |

IPF35\_V1

0

0

0

1.355428993

2.010083417

2.44332907

2.61146867

2.726050138

3.187099334

3.106732764

2.83078508

2.458064603

2.761567111

2.516719138

2.643828339

3.037696296

2.993651988

3.283914086

3.199671748

3.628428939

4.130718667

5.255021555

5.749688908

6.793798532

0

0

0

0

0

0

0

0

0
